# Supplementary material
Source: publisher site journal article supplement (https://www.spandidos-publications.com/1506/downloadSupplementary)

Figure S1. Analysis of transfection efficacy. (A) Relative MALAT1 expression levels in the si-Ctrl- and si-MALAT1-transfected Huh7 and HepG2 cells were analyzed by RT-qPCR. (B) Relative miR-375 expression levels in Huh7 cells following transfection with miR-NC and miR-375 mimics or inhibitors were analyzed by RT-qPCR. (C) YAP1 expression levels in Huh7 cells transfected with oeYAP1 and oeCtrl were analyzed by Western blotting. Data are presented as the mean  $\pm$  SD. \*\* $P < 0.01$ ;  $n = 3$ . YAP1, Yes-associated protein 1; MALAT1, metastasis-associated lung adenocarcinoma transcript 1; RT-qPCR, reverse transcription-quantitative PCR; miR, microRNA; NC, negative control; si-, small interfering RNA; oe, overexpression plasmid; Ctrl, control.

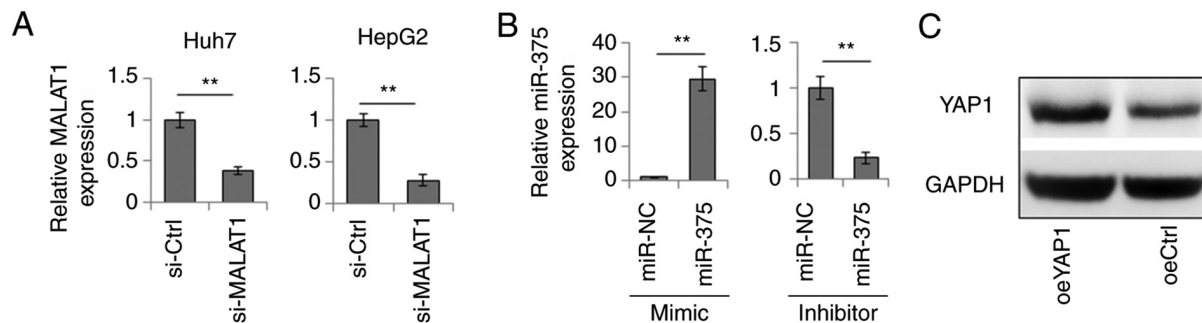

Supplement: Supplementary file 1 [file downloadSupplementary]
